# Supplementary material
Source: HighWire-hosted journal article supplement (http://jmg.bmjjournals.com/highwire/filestream/160496/field_highwire_adjunct_files/3/Table_S3.pdf)
Supplement: Table_S3.pdf [file Table_S3.pdf]

**Table S3.** Characteristics and spirometric measures of *Fgf10* +/- and *Fgf10* +/+ mice.

| Parameter†                   | <i>Fgf</i> +/-<br>(n = 12) |           | <i>Fgf</i> +/+<br>(n = 12) |           | Student's<br>t-test    |
|------------------------------|----------------------------|-----------|----------------------------|-----------|------------------------|
| <b>BW</b>                    | 26.6                       | ± 1.9     | 30.0                       | ± 1.8     | 1.6x10 <sup>-4</sup> * |
| <b>BW (WM)</b>               | 28.1                       | ± 1.0     | 29.0                       | ± 1.8     | 0.31                   |
| <b>LW</b>                    | 0.089                      | ± 0.0082  | 0.10                       | ± 0.0072  | 7.9x10 <sup>-5</sup> * |
| <b>LW (WM)</b>               | 0.093                      | ± 0.0074  | 0.11                       | ± 0.0052  | 0.045*                 |
| <b>LW/BW†</b>                | 0.0034                     | ± 0.00025 | 0.0035                     | ± 0.00016 | 0.17                   |
| <b>TLC</b>                   | 0.80                       | ± 0.15    | 0.98                       | ± 0.16    | 0.014*                 |
| <b>TLC (WM)</b>              | 0.86                       | ± 0.13    | 0.95                       | ± 0.19    | 0.36                   |
| <b>TLC/BW†</b>               | 0.03                       | ± 0.01    | 0.03                       | ± 0.00    | 0.21                   |
| <b>TLC/LW†</b>               | 8.90                       | ± 1.69    | 7.77                       | ± 3.86    | 0.38                   |
| <b>IVC</b>                   | 0.58                       | ± 0.09    | 0.69                       | ± 0.11    | 0.04*                  |
| <b>IVC (WM)</b>              | 0.64                       | ± 0.14    | 0.66                       | ± 0.12    | 0.82                   |
| <b>IVC/BW†</b>               | 0.022                      | ± 0.0032  | 0.023                      | ± 0.0031  | 0.44                   |
| <b>IVC/LW†</b>               | 6.49                       | ± 1.10    | 6.47                       | ± 0.90    | 0.97                   |
| <b>IVC/TLC†</b>              | 0.74                       | ± 0.09    | 0.72                       | ± 0.08    | 0.56                   |
| <b>FVC</b>                   | 0.72                       | ± 0.13    | 0.85                       | ± 0.13    | 0.047*                 |
| <b>FVC (WM)</b>              | 0.80                       | ± 0.13    | 0.80                       | ± 0.11    | 0.97                   |
| <b>FVC/BW†</b>               | 38.05                      | ± 4.98    | 36.00                      | ± 4.95    | 0.37                   |
| <b>FVC/LW†</b>               | 0.13                       | ± 0.02    | 0.13                       | ± 0.02    | 0.87                   |
| <b>FVC/TLC†</b>              | 0.91                       | ± 0.16    | 0.89                       | ± 0.15    | 0.73                   |
| <b>FEV<sub>75</sub></b>      | 0.67                       | ± 0.13    | 0.81                       | ± 0.12    | 0.02*                  |
| <b>FEV<sub>75</sub> (WM)</b> | 0.74                       | ± 0.13    | 0.77                       | ± 0.10    | 0.70                   |
| <b>FEV<sub>75</sub>/IVC</b>  | 1.16                       | ± 0.16    | 1.20                       | ± 0.14    | 0.59                   |
| <b>FEV<sub>75</sub>/FVC</b>  | 0.93                       | ± 0.03    | 0.96                       | ± 0.02    | 0.02*                  |
| <b>FEV<sub>75</sub>/BW†</b>  | 40.80                      | ± 5.80    | 37.34                      | ± 4.63    | 0.16                   |
| <b>FEV<sub>75</sub>/LW†</b>  | 0.14                       | ± 0.02    | 0.13                       | ± 0.01    | 0.52                   |
| <b>FEV<sub>75</sub>/TLC†</b> | 0.86                       | ± 0.16    | 0.86                       | ± 0.14    | 1.00                   |

\* denote significant difference of  $P < 0.05$  using two-tailed t-test assuming equal variance.

Plus – minus values are means ± SD. WM – Data from weight matched mice (n = 6). † Normalized values – measures divided by BW, LW or TLC. Abbreviations: BW – body weight, LW – lung weight, IVC - inspiratory vital capacity, FVC – forced vital capacity, FEV<sub>75</sub> - forced expiratory volume in 75 milliseconds.
